# Supplementary material for: Transcriptome Reveals the Molecular Mechanism of the ScALDH21 Gene from the Desert Moss Syntrichia caninervis Conferring Resistance to Salt Stress in Cotton
Source: MDPI journal article supplement (doi:10.3390/ijms24065822), 2023-03-18
Supplement: s1 [file s1]

**Supplementary Data:**

**Table S1. Real-time fluorescence quantitative PCR primer sequence information.**

| Primer name               | Sequence (5'-3')      | T <sub>m</sub> [°C] | GC (%) |
|---------------------------|-----------------------|---------------------|--------|
| Gohir.D07G214800.v2.1-F   | CGTGCGTGGGGCTCTATTAT  | 59.97               | 55.00  |
| Gohir.D07G214800.v2.1-R   | CGGTATGATCGGACTGGTGG  | 59.97               | 60.00  |
| Gohir.A04G039105.v2.1-F   | CGACTAGTTCCGGGTTTCGAG | 59.90               | 60.00  |
| Gohir.A04G039105.v2.1-R   | CCATAGGCTTTCGCTTTCGC  | 59.97               | 55.00  |
| Gohir.D13G003200.v2.1-F   | CACTTGGCAGGGCATCTAA   | 60.03               | 55.00  |
| Gohir.D13G003200.v2.1-R   | CCGTTTCTTGGGGTCTCGAA  | 59.97               | 55.00  |
| Gohir.D12G233800.1.v2.1-F | GGCCAGATCCACCATAGCTC  | 59.96               | 60.00  |
| Gohir.D12G233800.1.v2.1-R | CACCGCTCATAACAATGCGG  | 59.97               | 55.00  |
| 18S rRNA-F                | CGGCTACCACATCCAAGGAA  | 59.75               | 55.00  |
| 18S rRNA-R                | TGTCACTACCTCCCCGTGTCA | 62.56               | 57.14  |

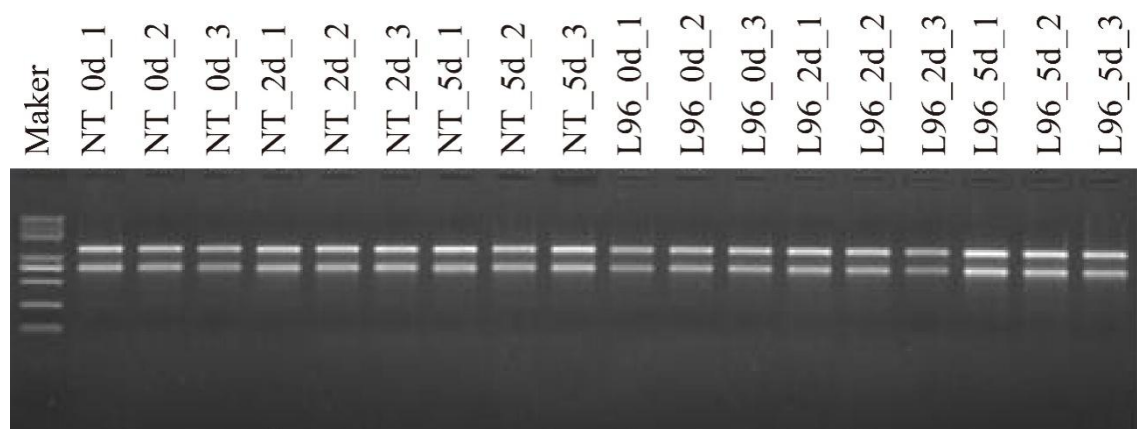

**Figure S1.** Transcriptome sequencing RNA integrity assay.

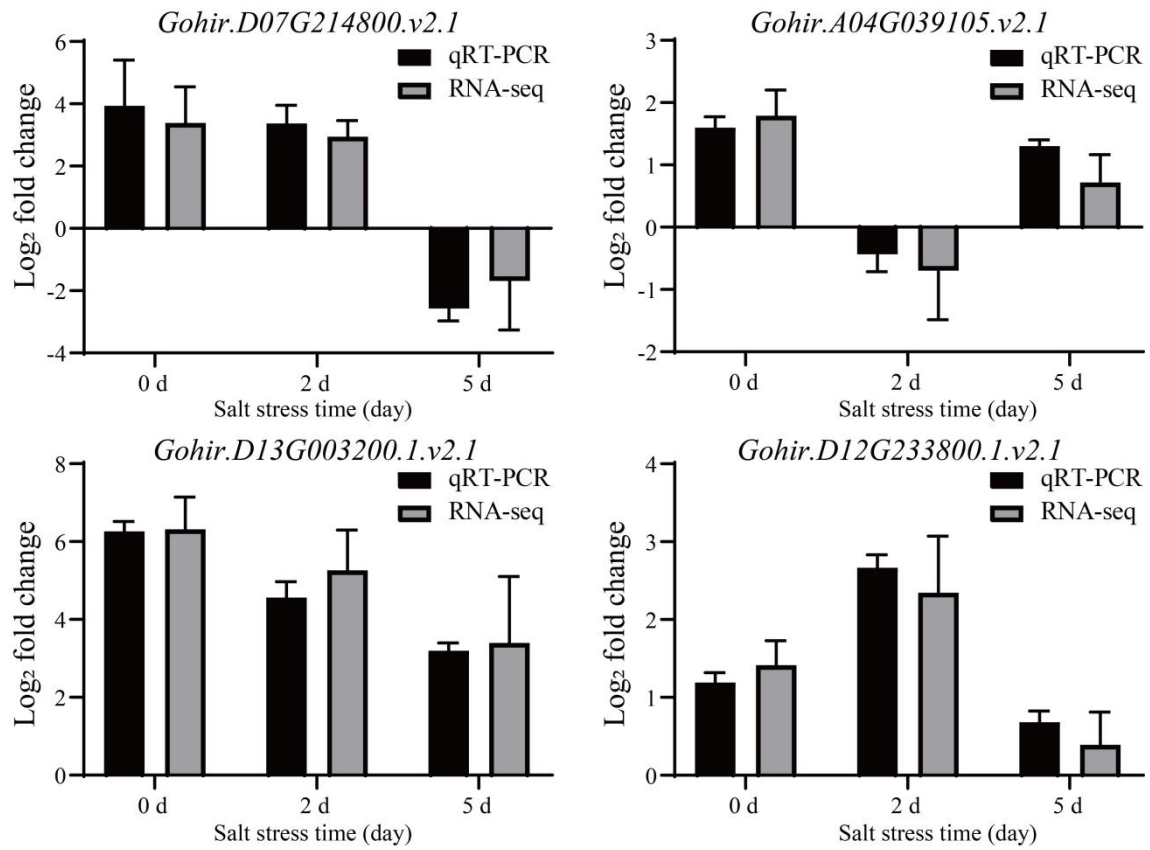

**Figure S2.** Validation of NT and L96 transcriptome under salt stress. The transcriptome data was log<sub>2</sub> fold change using FPKM, real-time fluorescence quantitative PCR gene expression data were shown as the mean  $\pm$  SD, n=3.

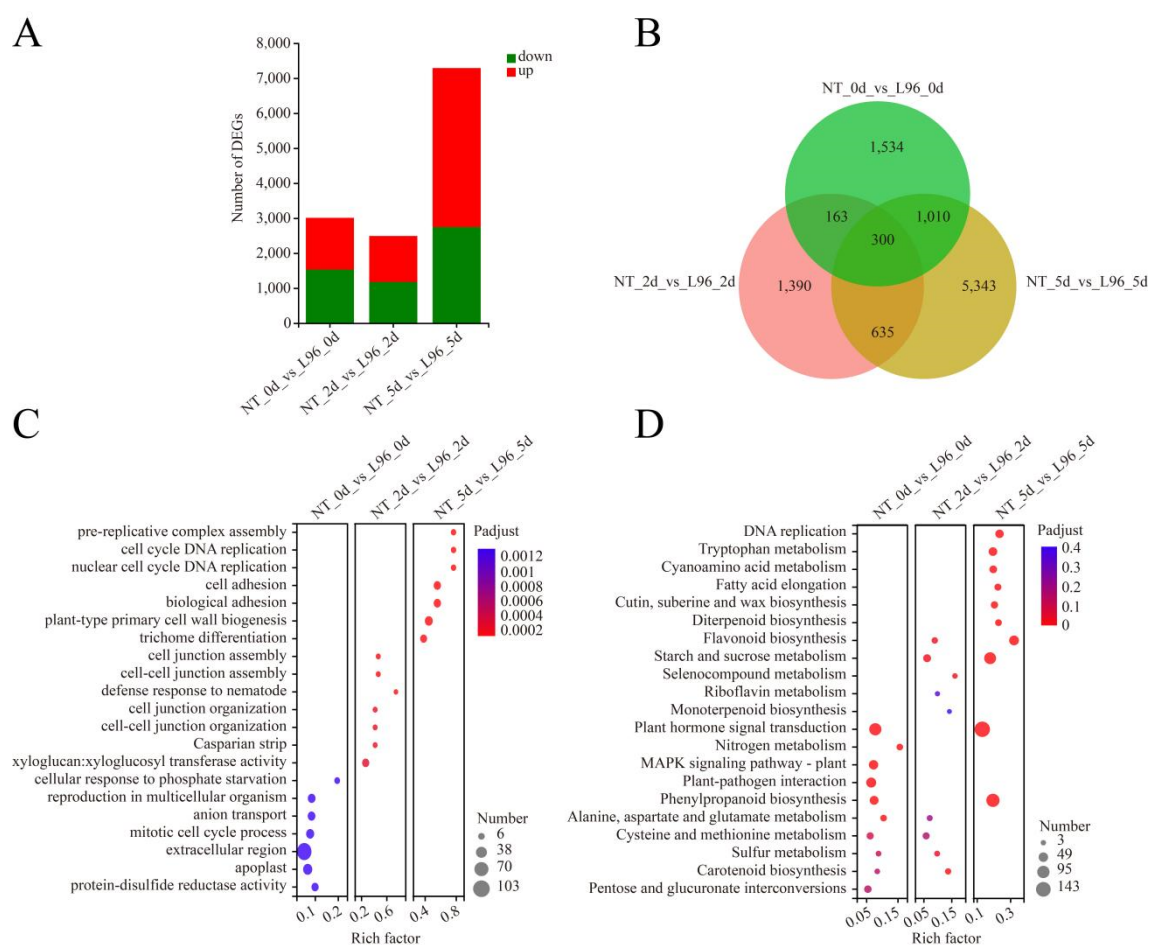

**Figure S3.** NT and L96 differential gene enrichment analysis. **(A)** Differential expression analysis of samples under salt stress. **(B)** Venn analysis of DEGs. **(C)** GO enrichment analysis of DEGs. **(D)** KEGG enrichment analysis of DEGs.

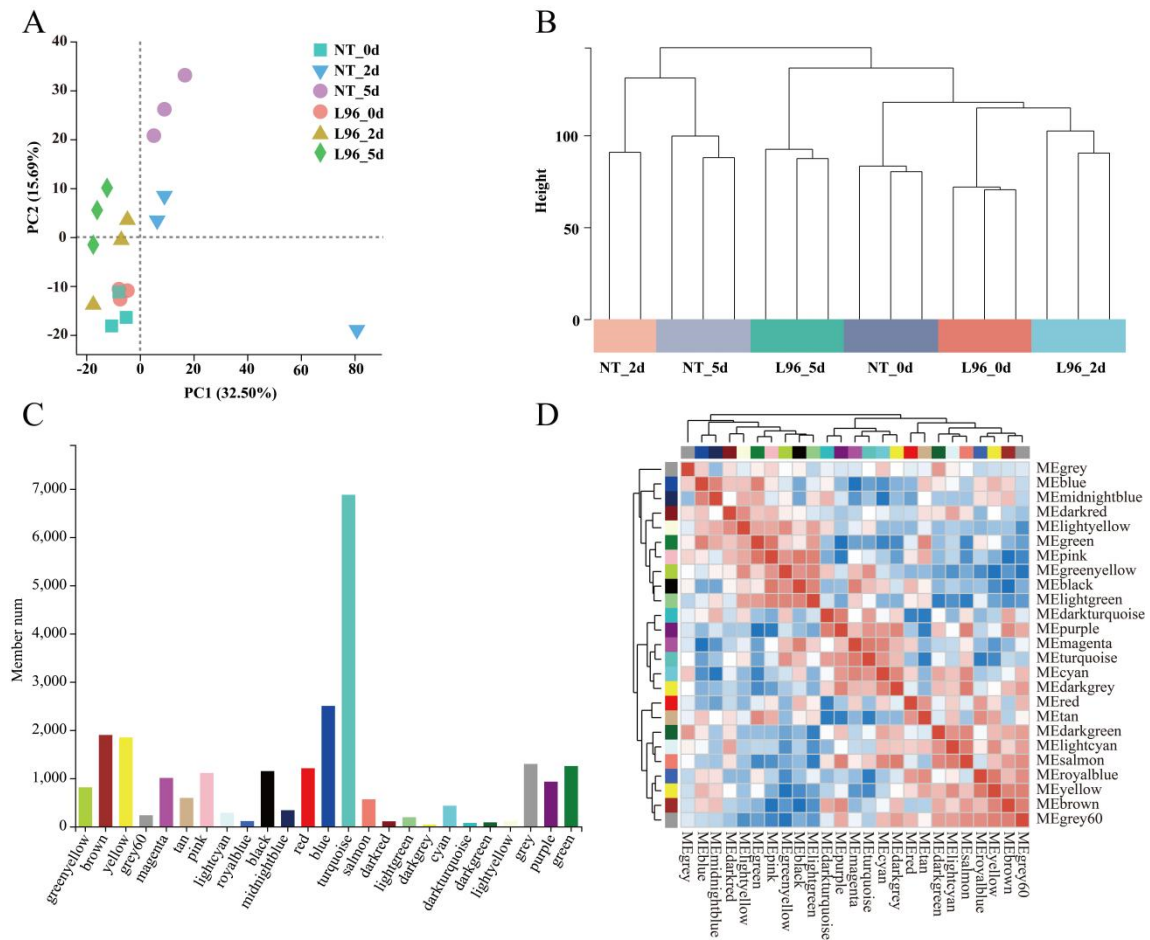

**Figure S4.** NT and L96 salt stress transcriptome WGCNA analysis. **(A)** Sample PCA analysis. **(B)** Sample clustering analysis. **(C)** WGCNA module identification. **(D)** WGCNA module correlation analysis.

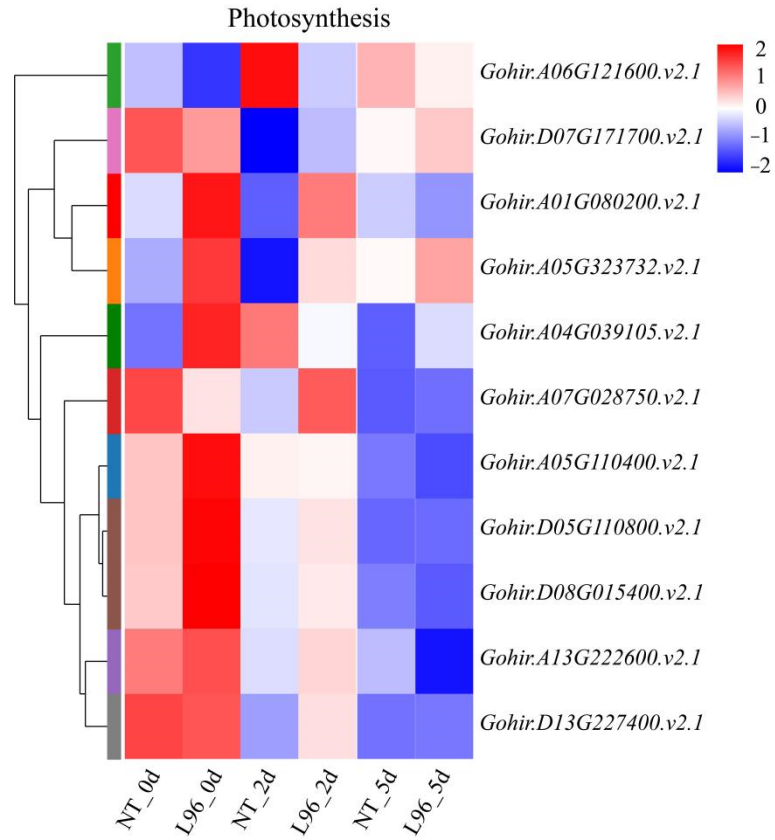

**Figure S5.** photosynthesis activated by L96 and NT under salt stress. Heatmap shows FPKM values in each treatment, normalized using z-score.

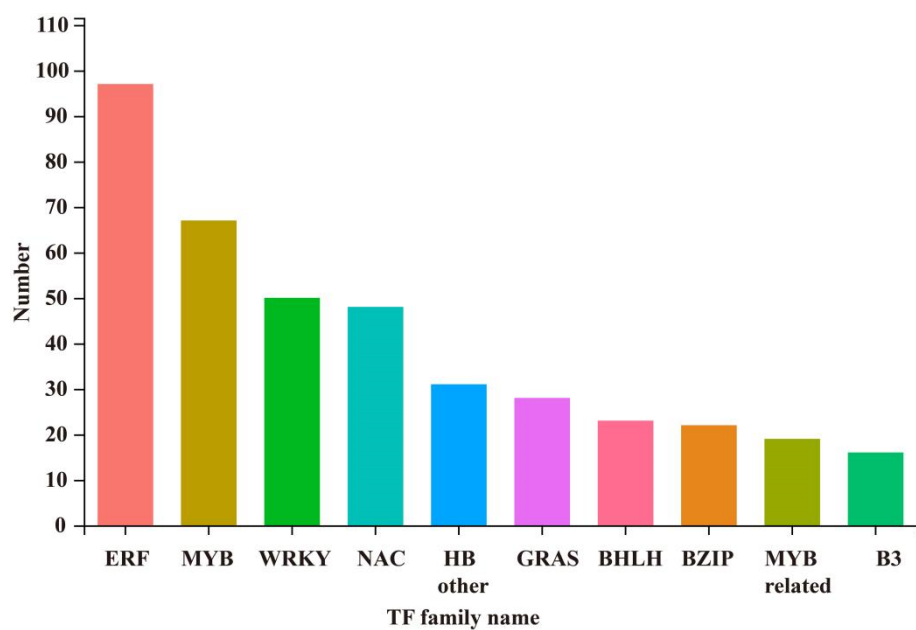

**Figure S6.** Statistics on the number of transcription factor families in WGCNA analysis.

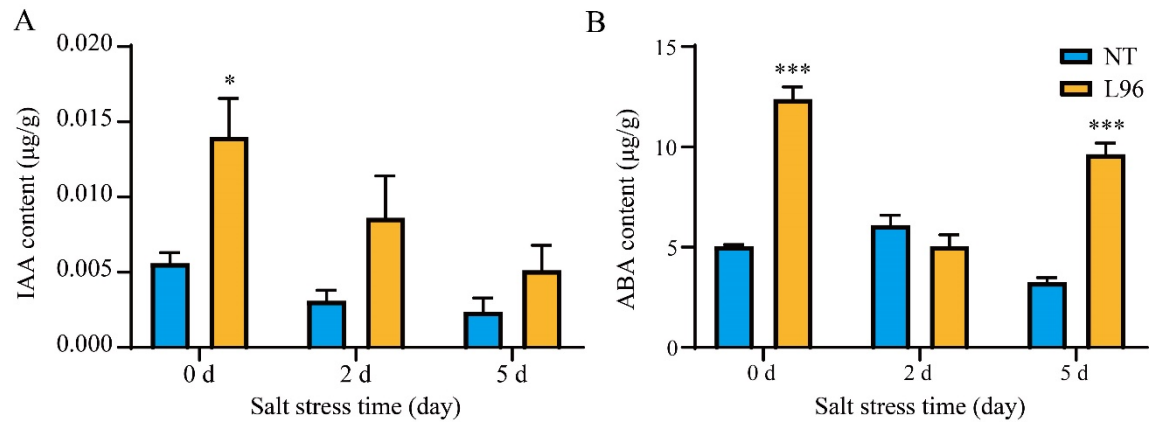

**Figure S7.** IAA and ABA content of NT and L96 plant under salt stress. Data represent the mean  $\pm$  SD from three biological replicates. Significance was determined by the least significant difference, asterisks indicate statistically significant differences from NT (\* $P < 0.05$ , \*\* $P < 0.01$ , \*\*\* $P < 0.001$ ).
